# Supplementary material for: Microfluidic fabrication of hollow protein microcapsules for rate-controlled release
Source: Royal Society of Chemistry journal article supplement (doi:10.1039/c7ra08645h), 2017-01-01

Supplementary information

Table S1. Secondary structure of samples prepared at different conditions

|          | Zein% | Dispersing flow rates | $\alpha$ -helix   | $\beta$ -sheet     | random coil        |
|----------|-------|-----------------------|-------------------|--------------------|--------------------|
| Raw zein |       |                       | 49.6% $\pm$ 6.23% | 20.20% $\pm$ 9.73% | 30.23% $\pm$ 5.54% |
| Sample 3 | 2%    | 0.3 ml/hr             | 5.87% $\pm$ 1.80% | 45.87% $\pm$ 2.45% | 48.20% $\pm$ 1.25% |
| Sample 5 | 4%    | 0.2 ml/hr             | 7.87% $\pm$ 1.90% | 44.10% $\pm$ 3.48% | 48.00% $\pm$ 2.50% |
| Sample 7 | 6%    | 0.1 ml/hr             | 6.17% $\pm$ 0.70% | 49.00% $\pm$ 1.51% | 44.83% $\pm$ 0.75% |

Figure S2: The SEM image of an ultra-cut microcapsule sample

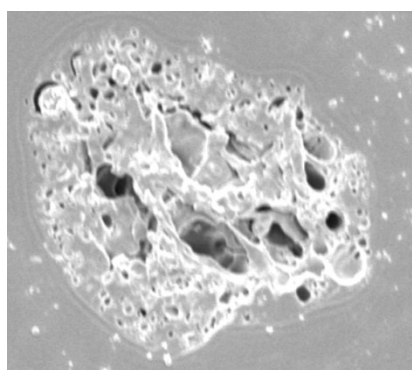

Supplement: c7ra08645h1.pdf [file c7ra08645h1.pdf]
